# Supplementary material
Source: publisher site journal article supplement (https://www.dovepress.com/get_supplementary_file.php?f=482713.docx)
Supplement: Supplementary file 1 [file get_supplementary_file.php]

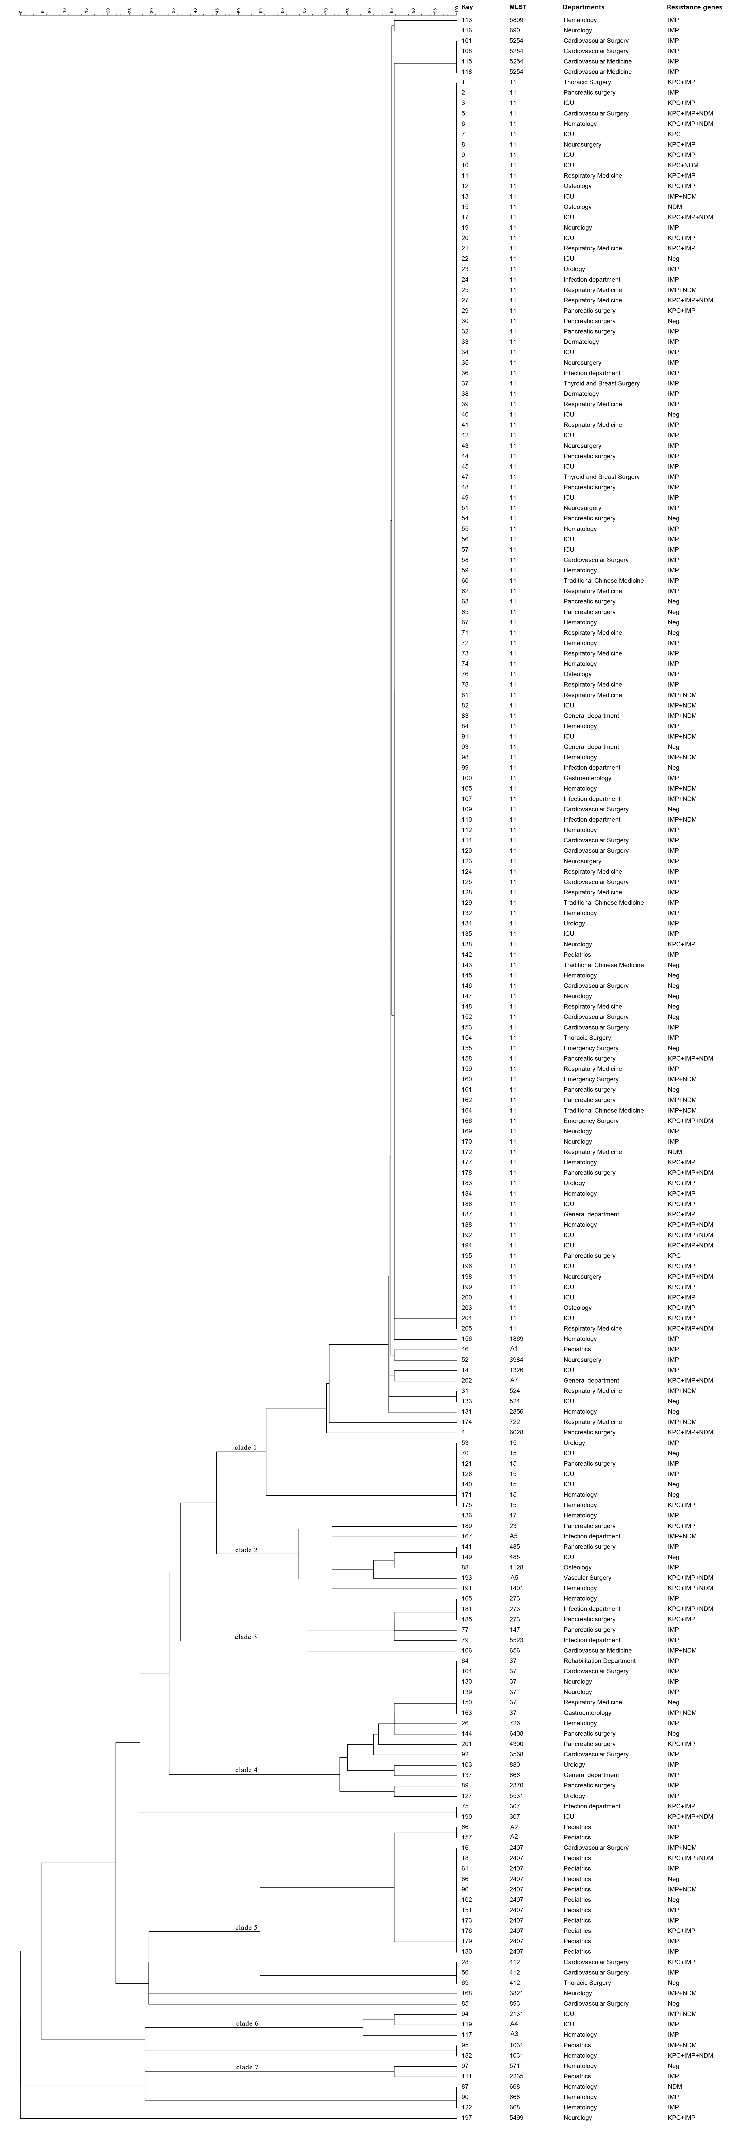


Figure S1 Molecular phylogenetic analysis based on MLST sequences of CRKP strains. Isolates are grouped based on MLST sequences using the maximum likelihood method (1000 bootstrap replicates) and the BioNumerics (version 7.6) software. ST, sequence type; ICU, intensive care unit.
